# Supplementary material for: A Nationally Representative Survey Assessing Restorative Sleep in US Adults
Source: PubMed Central journal article supplement (PMC9423762; doi:10.3389/frsle.2022.935228), 2022-07-21
Supplement: NIHMS1828283-supplement-Supplement.pdf [file NIHMS1828283-supplement-Supplement.pdf]

## Supplementary Information A

*Descriptive statistics of US adults according to the US Census Bureau.*

| <b>Variable</b>       | <b>Category</b>                   | <b>%</b> |
|-----------------------|-----------------------------------|----------|
| <b>Age</b>            | 18-29                             | 20.50%   |
|                       | 30-44                             | 25.20%   |
|                       | 45-59                             | 24.50%   |
|                       | 60+                               | 29.80%   |
| <b>Gender</b>         | Male                              | 48.30%   |
|                       | Female                            | 51.70%   |
| <b>Education</b>      | Less than high school diploma     | 9.80%    |
|                       | High school diploma or equivalent | 28.20%   |
|                       | Some college/ associates          | 27.70%   |
|                       | Bachelor's degree or above        | 34.30%   |
| <b>Race/Ethnicity</b> | White, non-Hispanic               | 62.80%   |
|                       | Black, non-Hispanic               | 11.90%   |
|                       | Hispanic                          | 16.70%   |
|                       | Asian, non-Hispanic               | 6.40%    |
|                       | Other                             | 2.20%    |

**Supplemental Information B**  
**The Restorative Sleep Questionnaire (REST-Q)**  
**Questionnaire and Scoring Procedure**

**Instruction:** For each of the following items, please tell me to what degree you felt each of the below when you woke up today, compared to before you went to sleep. Last night's sleep left me feeling...

|                                         | <i>Not at all</i> | <i>A little bit</i> | <i>Somewhat</i> | <i>Very much</i> | <i>Completely</i> |
|-----------------------------------------|-------------------|---------------------|-----------------|------------------|-------------------|
|                                         | <i>1</i>          | <i>2</i>            | <i>3</i>        | <i>4</i>         | <i>5</i>          |
| <i>RSQ 1. ...Tired (R)</i>              |                   |                     |                 |                  |                   |
| <i>RSQ 2. ...Sleepy(R)</i>              |                   |                     |                 |                  |                   |
| <i>RSQ 3. ...In a good mood</i>         |                   |                     |                 |                  |                   |
| <i>RSQ 4. ...Rested</i>                 |                   |                     |                 |                  |                   |
| <i>RSQ 5. ...Refreshed</i>              |                   |                     |                 |                  |                   |
| <i>RSQ 6. ...Ready to start the day</i> |                   |                     |                 |                  |                   |
| <i>RSQ 7. ...Energetic</i>              |                   |                     |                 |                  |                   |
| <i>RSQ 8. ...Mentally alert</i>         |                   |                     |                 |                  |                   |
| <i>RSQ 9. ...Grouchy (R)</i>            |                   |                     |                 |                  |                   |

**Scoring:** A total score on the REST-Q is calculated using the below formula. Scores range from 0 to 100. Total scores are then categorized into three levels: responses from 0 to 49.99 are assigned a label of “low;” responses from 50 to 74.99 are assigned a label of “somewhat;” and responses from 75 to 100 are assigned a label of “high” on the REST-Q.

$$\left[ \left( \frac{RSQ1 + RSQ2 + RSQ3 + RSQ4 + RSQ5 + RSQ6 + RSQ7 + RSQ8 + RSQ9}{9} \right) - 1 \right] \times 25$$

### Supplementary Information C

Results from the weighted logistic regressions examining the relationships between demographic factors and restorative sleep as scored on the REST-Q (low, somewhat, high).

| Variable                  | Category                          | REST-Q Score |                          |             |              |
|---------------------------|-----------------------------------|--------------|--------------------------|-------------|--------------|
|                           |                                   | Odds Ratio   | 95 % Confidence Interval |             | P-Value      |
|                           |                                   |              | Lower                    | Upper       |              |
| <b>Gender</b>             | Male                              |              | Reference                |             |              |
|                           | Female                            | 1.27         | 0.88                     | 1.83        | 0.192        |
| <b>Age</b>                | 18-29                             |              | Reference                |             |              |
|                           | 30-44                             | 1.02         | 0.43                     | 2.43        | 0.959        |
|                           | 45-59                             | 1.79         | 0.82                     | 3.91        | 0.140        |
|                           | 60+                               | <b>4.20</b>  | <b>1.92</b>              | <b>9.17</b> | <b>0.000</b> |
|                           |                                   |              |                          |             |              |
| <b>Race/Ethnicity</b>     | White, non-Hispanic               |              | Reference                |             |              |
|                           | Black, non-Hispanic               | 0.90         | 0.49                     | 1.66        | 0.736        |
|                           | Other, non-Hispanic               | 1.08         | 0.25                     | 4.72        | 0.916        |
|                           | Hispanic                          | 0.71         | 0.42                     | 1.22        | 0.216        |
|                           | More than one                     | 0.64         | 0.15                     | 2.73        | 0.547        |
|                           | Asian, non-Hispanic               | 1.09         | 0.37                     | 3.21        | 0.877        |
| <b>Education</b>          | Less than high school diploma     |              | Reference                |             |              |
|                           | High school diploma or equivalent | 0.54         | 0.20                     | 1.43        | 0.213        |
|                           | Some college/ associates          | 0.60         | 0.25                     | 1.45        | 0.255        |
|                           | Bachelor's degree                 | 0.84         | 0.33                     | 2.13        | 0.705        |
|                           | Grad/professional degree          | 1.13         | 0.45                     | 2.81        | 0.800        |
| <b>Marital Status</b>     | Married                           |              | Reference                |             |              |
|                           | Widowed                           | <b>2.35</b>  | <b>1.01</b>              | <b>5.42</b> | <b>0.046</b> |
|                           | Divorced                          | 1.58         | 0.91                     | 2.74        | 0.102        |
|                           | Separated                         | 0.93         | 0.37                     | 2.36        | 0.886        |
|                           | Never married                     | 0.60         | 0.33                     | 1.09        | 0.092        |
|                           | Living with partner               | 0.68         | 0.31                     | 1.50        | 0.335        |
| <b>Employment Status</b>  | Working (paid employee)           |              | Reference                |             |              |
|                           | Working (self)                    | 0.80         | 0.36                     | 1.79        | 0.584        |
|                           | Not working (temporary layoff)    | 0.48         | 0.10                     | 2.29        | 0.354        |
|                           | Not working (looking for work)    | 0.34         | 0.08                     | 1.46        | 0.147        |
|                           | Not working (retired)             | <b>2.02</b>  | <b>1.30</b>              | <b>3.14</b> | <b>0.002</b> |
|                           | Not working (disabled)            | 0.76         | 0.30                     | 1.92        | 0.565        |
| <b>Household Income</b>   | Not working (other)               | <b>0.36</b>  | <b>0.15</b>              | <b>0.89</b> | <b>0.027</b> |
|                           | Less than \$30,000                |              | Reference                |             |              |
|                           | \$30,000 to under \$60,000        | 1.36         | 0.74                     | 2.49        | 0.317        |
|                           | \$60,000 to under \$100,000       | 1.41         | 0.85                     | 2.32        | 0.178        |
| <b>Urban versus Rural</b> | \$100,000 or more                 | 1.54         | 0.89                     | 2.66        | 0.120        |
|                           | Non-Metro Area                    |              | Reference                |             |              |
| <b>Internet Access</b>    | Metro Area                        | 1.11         | 0.73                     | 1.68        | 0.639        |
|                           | No home access                    |              | Reference                |             |              |
| <b>Home Ownership</b>     | Home access                       | 1.18         | 0.72                     | 1.94        | 0.517        |
|                           | Owned                             |              | Reference                |             |              |
|                           | Rented for cash                   | <b>0.65</b>  | <b>0.43</b>              | <b>0.97</b> | <b>0.034</b> |
| <b>Household Size</b>     | Occupied without payment          | <b>0.32</b>  | <b>0.10</b>              | <b>1.00</b> | <b>0.049</b> |
|                           | I live by myself                  |              | Reference                |             |              |
|                           | 2 persons                         | 0.94         | 0.56                     | 1.57        | 0.814        |
|                           | 3 persons                         | <b>0.51</b>  | <b>0.29</b>              | <b>0.87</b> | <b>0.014</b> |
|                           | 4 persons                         | <b>0.39</b>  | <b>0.24</b>              | <b>0.64</b> | <b>0.000</b> |
|                           | 5 persons                         | <b>0.17</b>  | <b>0.07</b>              | <b>0.40</b> | <b>0.000</b> |
|                           | +6 persons                        | 0.49         | 0.19                     | 1.26        | 0.139        |

Notes.

Bold indicates significance at the p<0.05 level.

The outcome variable was dichotomized, coded so that 1 represents a score of “high” on the REST-Q and 0 represents a score of “low” or “somewhat” on the REST-Q.
